# Supplementary material for: 16 Weeks of Progressive Barefoot Running Training Changes Impact Force and Muscle Activation in Habitual Shod Runners
Source: PLoS One. 2016 Dec 1;11(12):e0167234. doi: 10.1371/journal.pone.0167234 (PMC5132300; doi:10.1371/journal.pone.0167234)
Supplement: S3 File — (XLSX) [file pone.0167234.s003.xlsx]

## Sheet: Plan1
sujeito	condicao	coleta	Imp50	Fy1	tFy1	LR
1	1	0	0.0341616	1.61906	0.0165457	15.2375
2	1	0	0.0454543	1.65567	0.0333187	50.498
3	1	0	0.0390555	1.36111	0.0341818	35.9093
4	1	0	0.0337438	1.21199	0.0323102	29.9926
5	1	0	0.0399729	1.50532	0.0426644	35.598
6	1	0	0.0443768	1.45648	0.0302348	41.7347
7	1	0	0.0271009	1.31167	0.0211696	14.6138
8	1	0	0.0268166	1.12275	0.0234366	11.5073
9	1	0	0.038775
10	1	0	0.0289878	1.42429	0.0489115	24.7586
11	1	0	0.0300118	1.57471	0.044674	35.0548
12	1	0	0.0242376	1.34093	0.0338246	20.0205
13	1	0	0.02518	1.28631	0.0528701	18.0973
14	1	0	0.0566664	1.72691	0.029215	53.5301
15	1	0	0.0424968	1.39334	0.0375978	38.2557
16	1	0	0.0163638	1.01854	0.0439906	12.3386
17	1	0	0.0195653	1.40446	0.0449258	15.4947
18	1	0	0.031543	1.31608	0.0322331	21.9366
19	1	0	0.0257676	1.63286	0.0458883	23.5239
20	1	0	0.0360159
1	2	0	0.0368059	1.68874	0.0181643	29.3391
2	2	0	0.0456992	1.84974	0.0173352	75.5134
3	2	0	0.0346358	1.67951	0.0276606	22.7222
4	2	0	0.0256275	1.46221	0.0241805	18.5863
5	2	0	0.0497549		0.0223244	58.8724
6	2	0	0.0434401	1.24389	0.0173799	45.9573
7	2	0	0.0354637	1.31009	0.0164523	15.4433
8	2	0	0.0452092	1.37052	0.0211817	53.8569
9	2	0	0.040049	1.40351	0.0175024	22.5206
10	2	0	0.0386272	1.82583	0.0232778	49.1546
11	2	0	0.055763	1.81251	0.0165529
12	2	0	0.0231989	1.54146	0.0364222	16.0796
13	2	0	0.0378955	1.3824	0.0328493	29.9862
14	2	0	0.0549919	1.58212	0.0240296	68.4021
15	2	0	0.0429475	1.85446	0.0188026	70.1657
16	2	0	0.0292017	1.03912	0.0161291	17.6518
17	2	0	0.0416393	1.57716	0.0203849	38.204
18	2	0	0.0452673	1.31945	0.0174695	58.7873
19	2	0	0.0572429		0.0175812
20	2	0	0.0424024	1.42314	0.0303894	48.2505
2	1	4	0.04215	1.52516	0.0327	47.1536
8	1	4	0.0296574	0.658622	0.0250949	18.75
10	1	4	0.019792	0.968375	0.0359904	14.8447
14	1	4	0.0413391	1.43691	0.0340613	40.9512
15	1	4	0.0380499	1.34756	0.03556	36.7677
18	1	4	0.021314	0.96739	0.0383059	15.2957
2	2	4	0.0334388	1.28049	0.035552	34.0043
8	2	4	0.0340886	0.825734	0.0158983	36.5347
10	2	4	0.0241549	0.769888	0.0143891	28.0621
14	2	4	0.0338045	0.945965	0.0225474	21.9489
15	2	4	0.0378128	0.818877	0.0117116	45.1186
18	2	4	0.0328989	0.696751	0.0125457	9.18626
